# Supplementary material for: In situ fabrication of fluorine-modified acrylate-based gel polymer electrolytes for lithium-metal batteries
Source: Royal Society of Chemistry journal article supplement (doi:10.1039/d3qm00362k), 2023-01-01
Supplement: d3qm00362k1.pdf [file d3qm00362k1.pdf]

## Supporting Information

### ***In situ* fabrication of fluorine-modified acrylate-based gel polymer electrolytes for lithium-metal batteries**

Kun Yang<sup>1</sup>, Zhichuan Shen<sup>1</sup>, Junqiao Huang<sup>1</sup>, Jiawei Zhong<sup>1</sup>, Yuhan Lin<sup>1</sup>, Junli Zhu<sup>1</sup>,

Jiashun Chen<sup>1</sup>, Yating Wang<sup>1</sup>, Tangtang Xie<sup>2,3</sup>, Jie Li<sup>2\*</sup>, Zhicong Shi<sup>1,4\*</sup>

<sup>1</sup> Institute of Batteries, School of Materials and Energy, Guangdong University of Technology, Guangzhou, 510006, China

<sup>2</sup> Department of Energy, Politecnico di Milano, Via Lambruschini, 4, Milano, 20156, Italy

<sup>3</sup> The Testing and Technology Center for Industrial Products, Shenzhen Customs, Shenzhen, Guangdong, 518067, China

<sup>4</sup> Key Laboratory of Advanced Energy Materials Chemistry (Ministry of Education), Nankai University, Tianjin, 300071, China

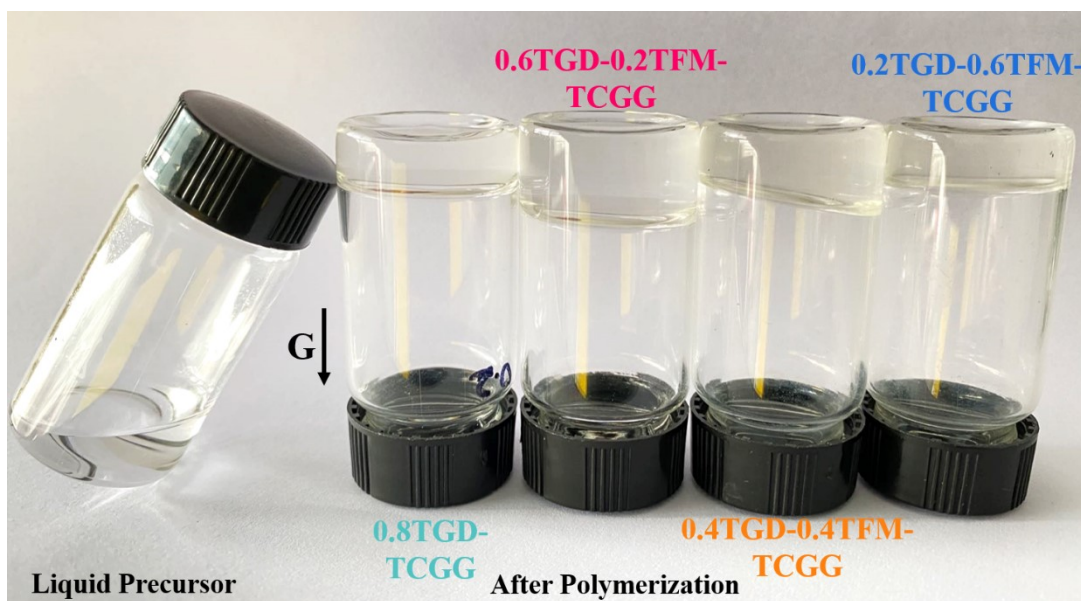

Fig. S1. Digital images of GPEs before and after thermal polymerization.

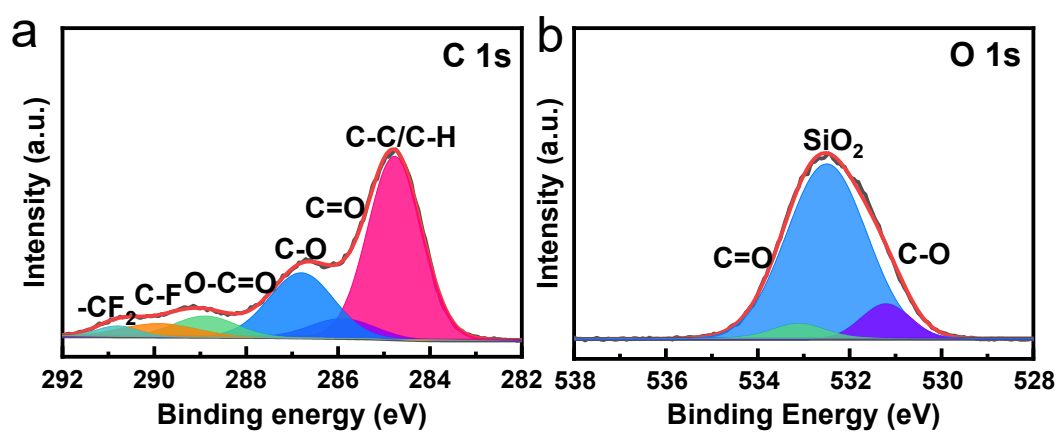

Fig. S2. XPS spectra on (a) C 1s and (b) O 1s of 0.4TGD-0.4TFM-TCGG-SiO<sub>2</sub>NF.

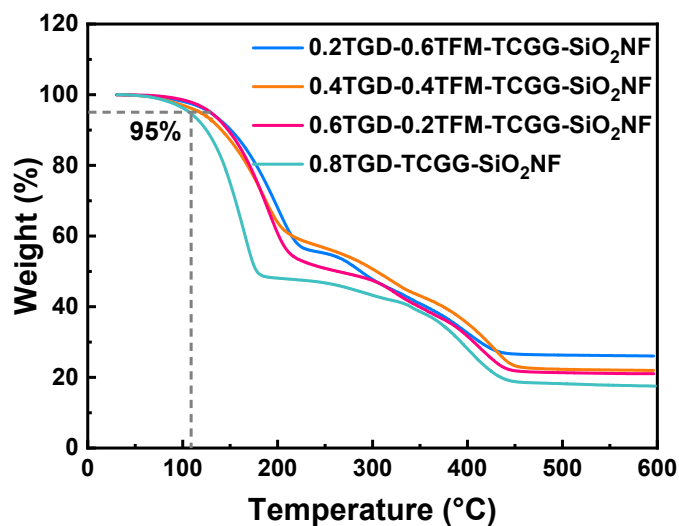

**Fig. S3.** TG curves of 0.8TGD-TCGG-SiO<sub>2</sub>NF, 0.6TGD-0.2TFM-TCGG-SiO<sub>2</sub>NF, 0.4TGD-0.4TFM-TCGG-SiO<sub>2</sub>NF, and 0.2TGD-0.6TFM-TCGG-SiO<sub>2</sub>NF.

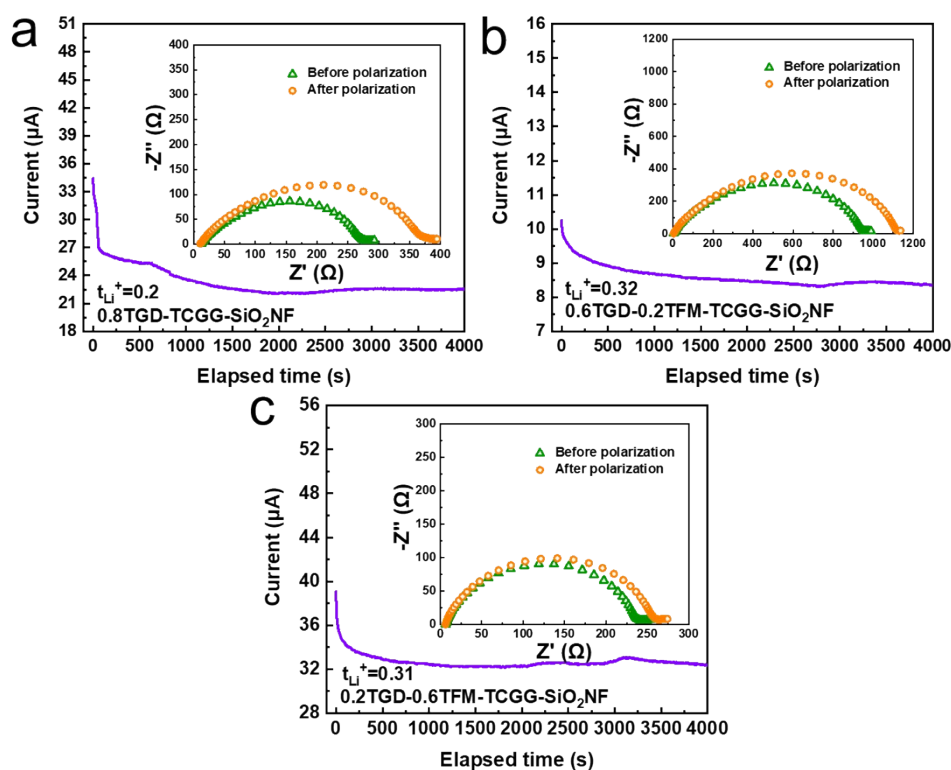

**Fig. S4.** Current and EIS curves of (a) 0.8TGD-TCGG-SiO<sub>2</sub>NF, (b) 0.6TGD-0.2TFM-TCGG-SiO<sub>2</sub>NF, and (c) 0.2TGD-0.6TFM-TCGG-SiO<sub>2</sub>NF before and after polarization at 25 °C.

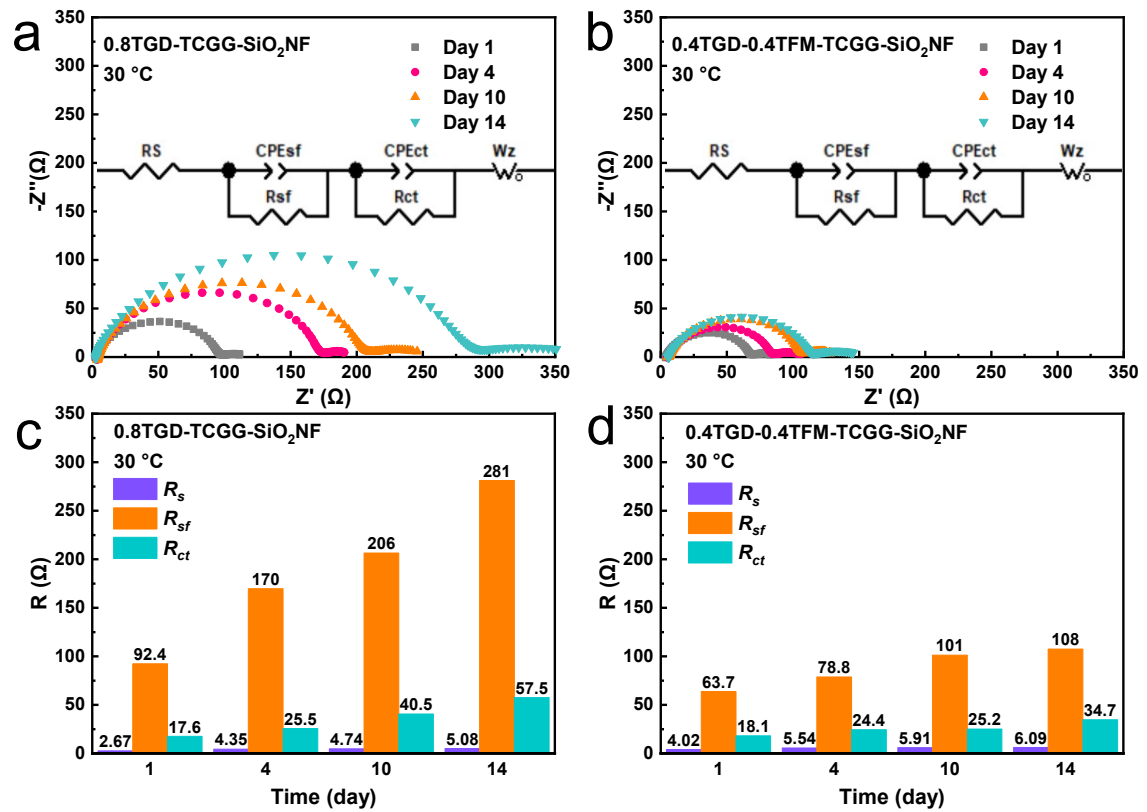

**Fig. S5.** EIS curves and fitting results of Li|0.8TGD-TCGG-SiO<sub>2</sub>NF|Li and Li|0.4TGD-0.4TFM-TCGG-SiO<sub>2</sub>NF|Li cells at 30 °C.

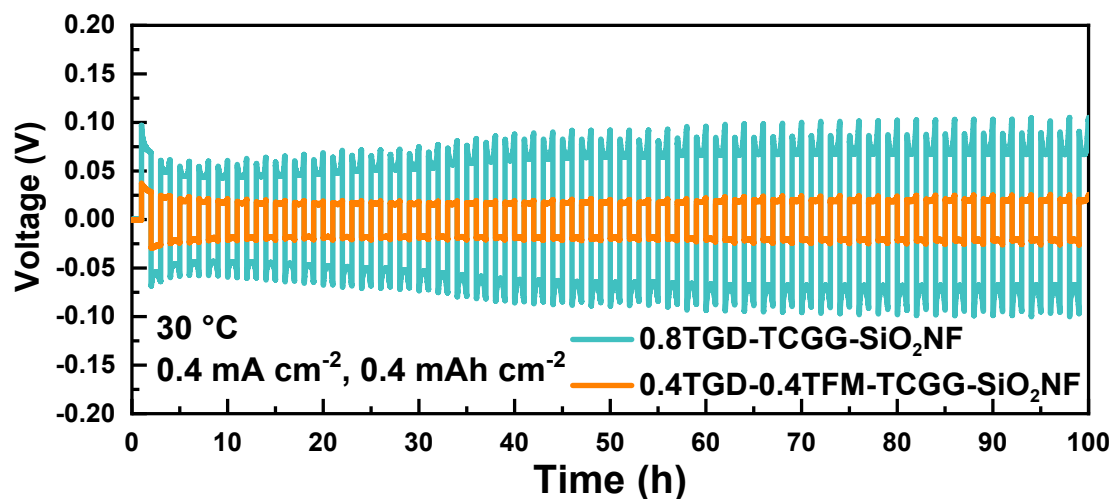

**Fig. S6.** Galvanostatic cycling profiles of Li|0.8TGD-TCGG-SiO<sub>2</sub>NF|Li and Li|0.4TGD-0.4TFM-TCGG-SiO<sub>2</sub>NF|Li cells at the current densities of 0.4 mA cm<sup>-2</sup> with a restricted specific capacity of 0.4 mAh cm<sup>-2</sup> at 30 °C.

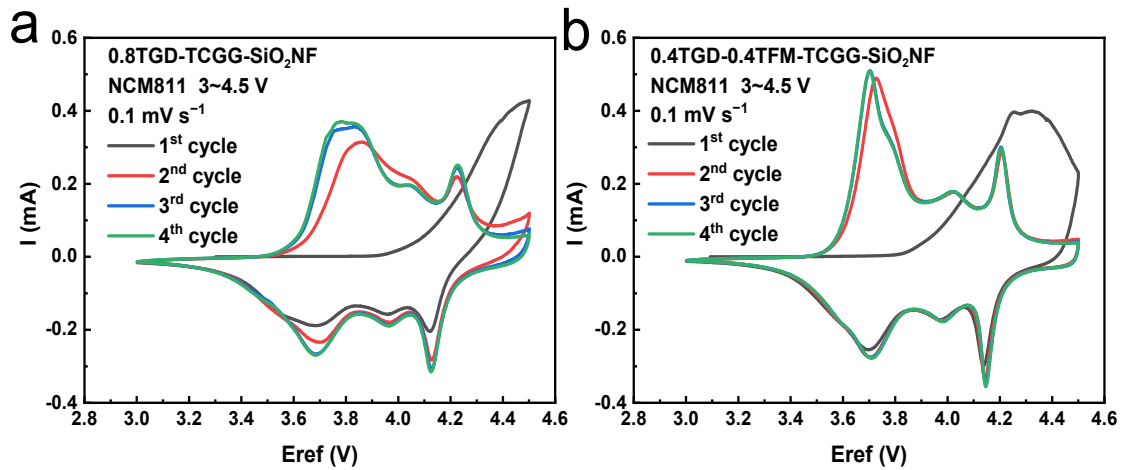

**Fig. S7.** CV curves of (a) NCM811|0.8TGD-TCGG-SiO<sub>2</sub>NF|Li and (b) NCM811|0.4TGD-0.4TFM-TCGG-SiO<sub>2</sub>NF|Li batteries at 3.0 ~ 4.5 V with a scan rate of 0.1 mV s<sup>-1</sup> at 30 °C.

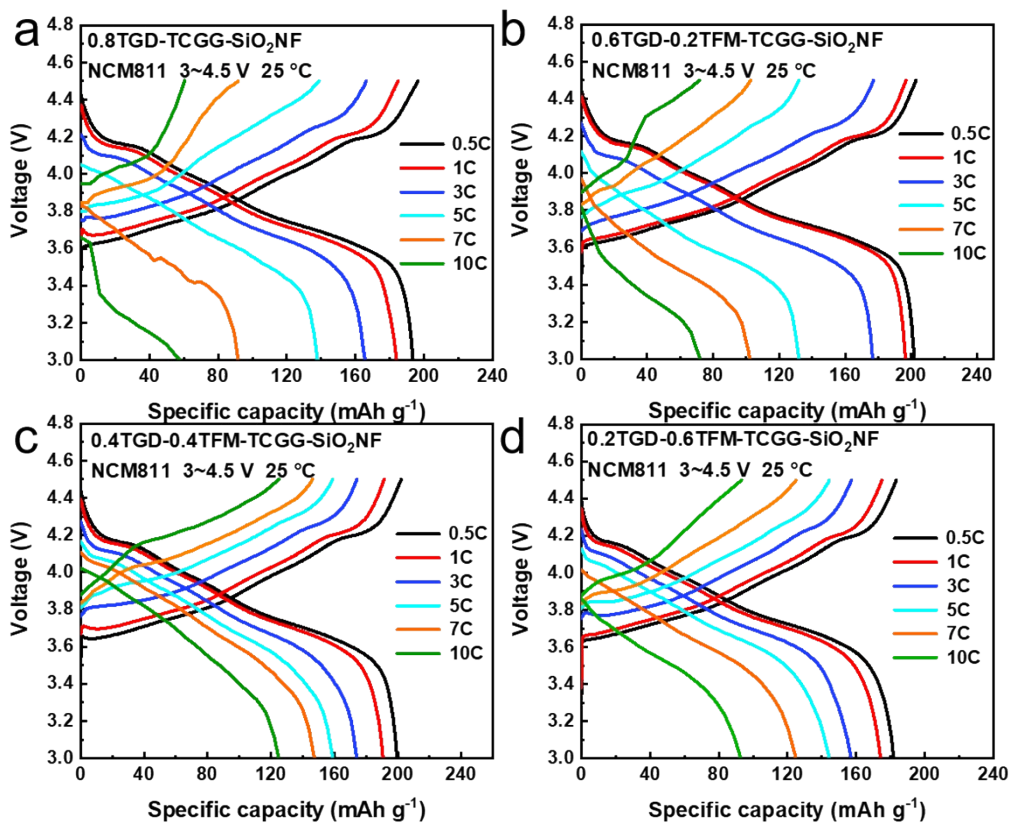

**Fig. S8.** Voltage profiles of (a) NCM811|0.8TGD-TCGG-SiO<sub>2</sub>NF|Li, (b) NCM811|0.6TGD-0.2TFM-TCGG-SiO<sub>2</sub>NF|Li, (c) NCM811|0.4TGD-0.4TFM-

TCGG-SiO<sub>2</sub>NF|Li, and (d) NCM811|0.2TGD-0.6TFM-TCGG-SiO<sub>2</sub>NF|Li batteries at various C-rate.

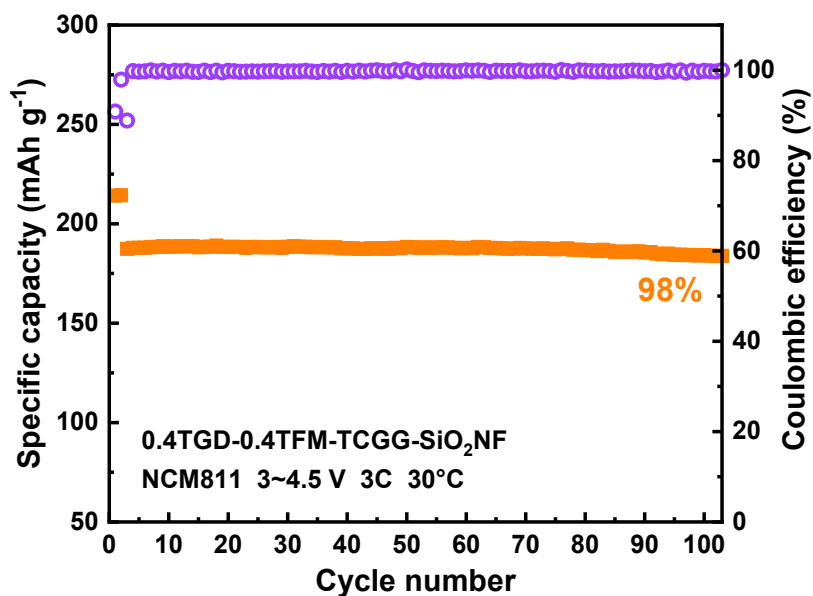

**Fig. S9.** Cycling performance of NCM811|0.4TGD-0.4TFM-TCGG-SiO<sub>2</sub>NF|Li battery at 3C.

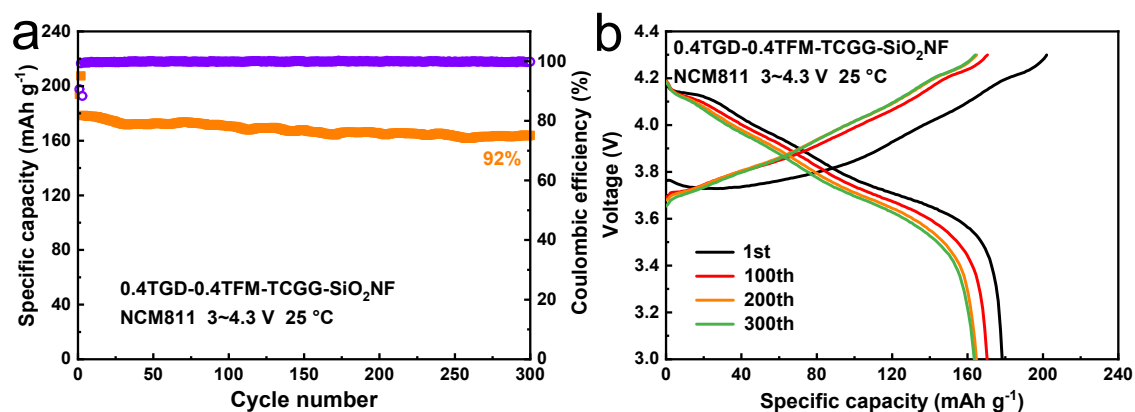

**Fig. S10.** (a) Cycling performance and (b) voltage profiles of NCM811|0.4TGD-0.4TFM-TCGG-SiO<sub>2</sub>NF|Li battery at 2C.

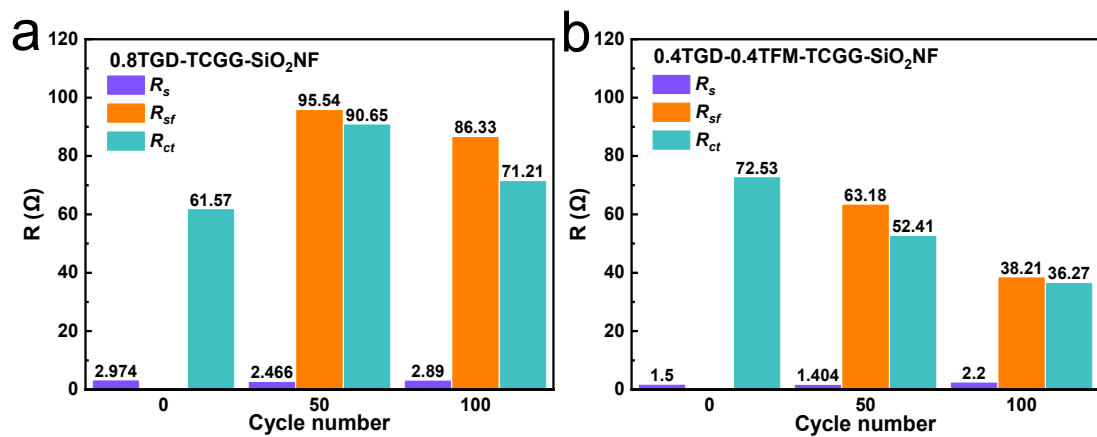

**Fig. S11.**  $R_s$ ,  $R_{sf}$ , and  $R_{ct}$  variation of NCM811|0.8TGD-TCGG-SiO<sub>2</sub>NF|Li and NCM811|0.4TGD-0.4TFM-TCGG-SiO<sub>2</sub>NF|Li batteries.

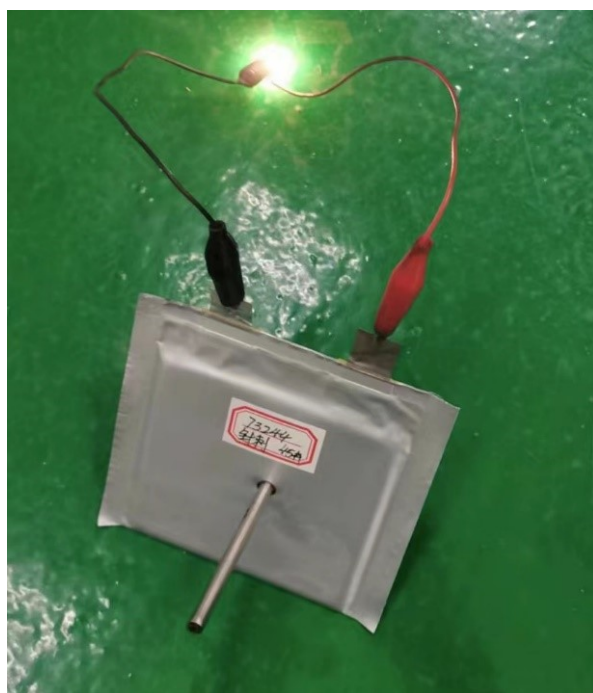

**Fig. S12.** Pinprick testing of pouch battery.

**Table. S1.** Composition of different GPEs.

|                    | TGD (g) | TFM (g) | TCGG (g) | AIBN (mg) |
|--------------------|---------|---------|----------|-----------|
| 0.8TGD-TCGG        | 0.8     | 0       | 4.5      | 8         |
| 0.6TGD-0.2TFM-TCGG | 0.6     | 0.2     | 4.5      | 8         |
| 0.4TGD-0.4TFM-TCGG | 0.4     | 0.4     | 4.5      | 8         |
| 0.2TGD-0.6TFM-TCGG | 0.2     | 0.6     | 4.5      | 8         |

**Table. S2.** Ionic conductivities ( $\sigma$ ) of GPEs.

|       | 0.8TGD-TCGG-<br>SiO <sub>2</sub> NF<br>(S cm <sup>-1</sup> ) | 0.6TGD-0.2TFM-<br>TCGG-SiO <sub>2</sub> NF<br>(S cm <sup>-1</sup> ) | 0.4TGD-0.4TFM-<br>TCGG-SiO <sub>2</sub> NF<br>(S cm <sup>-1</sup> ) | 0.2TGD-0.6TFM-<br>TCGG-SiO <sub>2</sub> NF<br>(S cm <sup>-1</sup> ) |
|-------|--------------------------------------------------------------|---------------------------------------------------------------------|---------------------------------------------------------------------|---------------------------------------------------------------------|
| 30 °C | 1.67×10 <sup>-4</sup>                                        | 2.60×10 <sup>-4</sup>                                               | 3.56×10 <sup>-4</sup>                                               | 2.15×10 <sup>-4</sup>                                               |
| 40 °C | 1.97×10 <sup>-4</sup>                                        | 2.74×10 <sup>-4</sup>                                               | 4.21×10 <sup>-4</sup>                                               | 2.57×10 <sup>-4</sup>                                               |
| 50 °C | 2.35×10 <sup>-4</sup>                                        | 3.02×10 <sup>-4</sup>                                               | 4.70×10 <sup>-4</sup>                                               | 3.24×10 <sup>-4</sup>                                               |
| 60 °C | 2.73×10 <sup>-4</sup>                                        | 3.10×10 <sup>-4</sup>                                               | 4.80×10 <sup>-4</sup>                                               | 3.58×10 <sup>-4</sup>                                               |
| 70 °C | 3.05×10 <sup>-4</sup>                                        | 3.29×10 <sup>-4</sup>                                               | 5.00×10 <sup>-4</sup>                                               | 3.79×10 <sup>-4</sup>                                               |
| 80 °C | 3.17×10 <sup>-4</sup>                                        | 3.53×10 <sup>-4</sup>                                               | 5.10×10 <sup>-4</sup>                                               | 4.10×10 <sup>-4</sup>                                               |



**Table. S3.** The electrochemical performances of this work and reported GPEs.

| Battery                                          | $t_{\text{Li}^+}$ | Test conditions    | Initial capacity (mAh g <sup>-1</sup> ) | Cycles capacity retention | Reference |
|--------------------------------------------------|-------------------|--------------------|-----------------------------------------|---------------------------|-----------|
| NCM811 TFEMA-VEC Li                              | 0.44              | 3~4.5 V<br>25 °C   | 1C, 218                                 | 300 <sup>th</sup> , 70%   | [1]       |
| LFP PEGDMA-ETFP/Li                               | 0.42              | 2.5~3.8 V<br>25 °C | 0.5C, 142.1                             | 100 <sup>th</sup> , 98%   | [2]       |
| NCA MA-HFMA-MMA Li                               | 0.47              | 3~4.3 V<br>25 °C   | 0.5C, 162.2                             | 200 <sup>th</sup> , 91%   | [3]       |
| LFP PEGDA-ETPTA Li                               | 0.7               | 2.5~4.0 V<br>25 °C | 1C, 124.4                               | 200 <sup>th</sup> , 76%   | [4]       |
| LCO PVCA Li                                      | 0.57              | 2.5~4.3 V<br>50 °C | 0.1C, 146.0                             | 150 <sup>th</sup> , 82%   | [5]       |
| NCM811 0.4TGD-0.4TFM-TCGG-SiO <sub>2</sub> NF Li | 0.57              | 3~4.3 V<br>25 °C   | 2C, 178.4                               | 300 <sup>th</sup> , 92%   | This work |
|                                                  |                   | 3~4.5 V<br>25 °C   | 2C, 184.2                               | 260 <sup>th</sup> , 91%   |           |

## References

- [1] Wang Y, Chen S S, Li Z Y, et al. In-situ generation of fluorinated polycarbonate copolymer solid electrolytes for high-voltage Li-metal batteries[J]. *Energy Storage Materials*, 2022, 45: 474-483.
- [2] Li J, Huo F, Yang Y. Constructing stable lithium interfaces via coordination of fluorinated ether and liquid crystal for room-temperature solid-state lithium metal batteries[J]. *Chemical engineering journal*, 2022(433P2).
- [3] Ma Y, Sun Q, Wang Z, et al. Improved interfacial chemistry and enhanced high voltage-resistance capability of an in situ polymerized electrolyte for  $\text{LiNi}_{0.8}\text{Co}_{0.15}\text{Al}_{0.05}\text{O}_2\text{-Li}$  batteries[J]. *Journal of Materials Chemistry A*, 2021, 9(6): 3597-3604.
- [4] Shao D, Wang X, Li X, et al. Internal in situ gel polymer electrolytes for high-performance quasi-solid-state lithium ion batteries[J]. *Journal of Solid State Electrochemistry*, 2019, 23(10): 2785-2792.
- [5] Chai J, Liu Z, Ma J, et al. In Situ Generation of Poly (Vinylene Carbonate) Based Solid Electrolyte with Interfacial Stability for  $\text{LiCoO}_2$  Lithium Batteries[J]. *Advanced Science*, 2017, 4(2).
